# Supplementary material for: Metabolism Study of Anamorelin, a GHSR1a Receptor Agonist Potentially Misused in Sport, with Human Hepatocytes and LC-HRMS/MS
Source: MDPI journal article supplement (doi:10.3390/metabo13080949), 2023-08-15

**Figure S1.** High-resolution tandem mass spectrometry spectra after positive electrospray ionization of anamorelin minor metabolites in human hepatocyte incubations. Gluc, glucuronide.

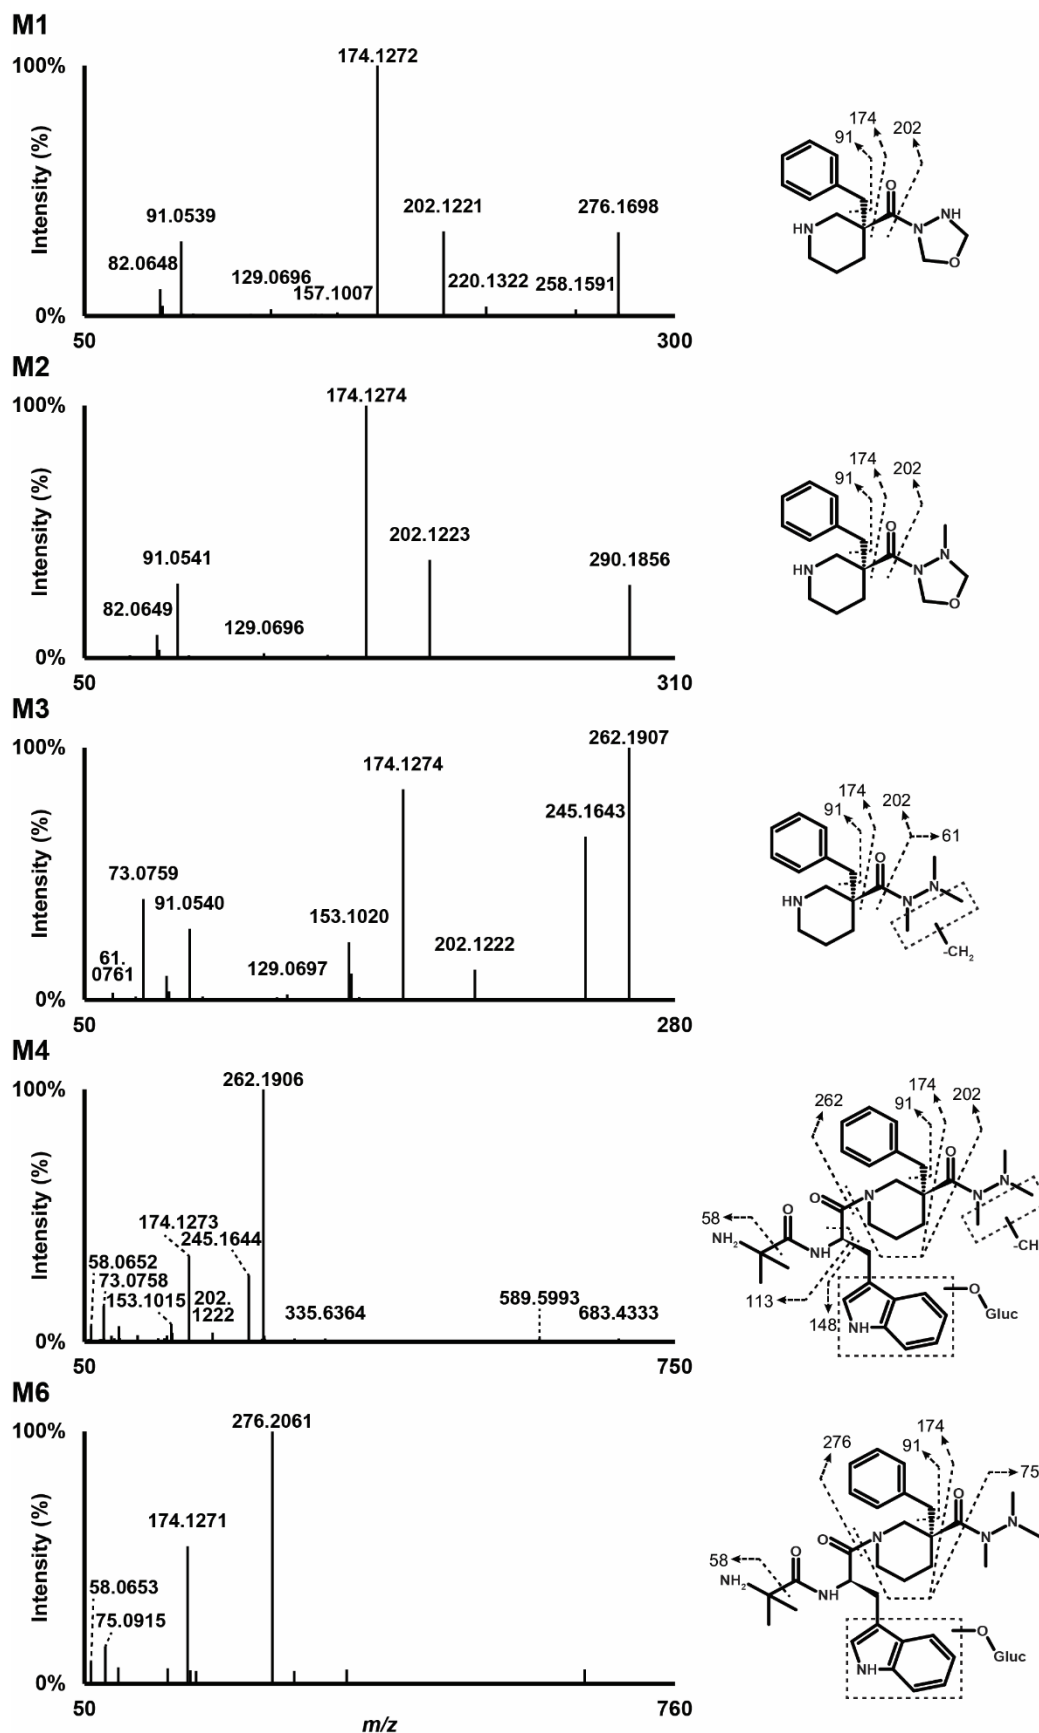

**M7**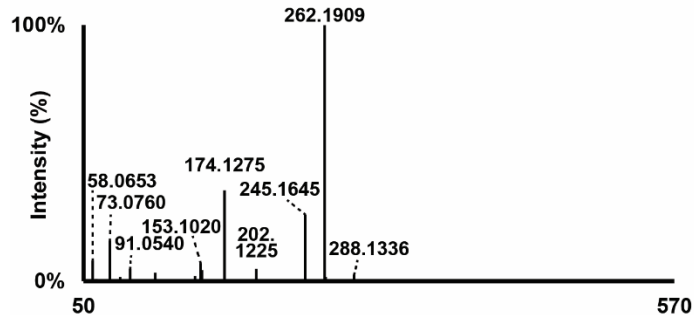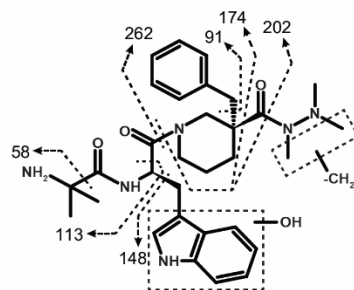**M9**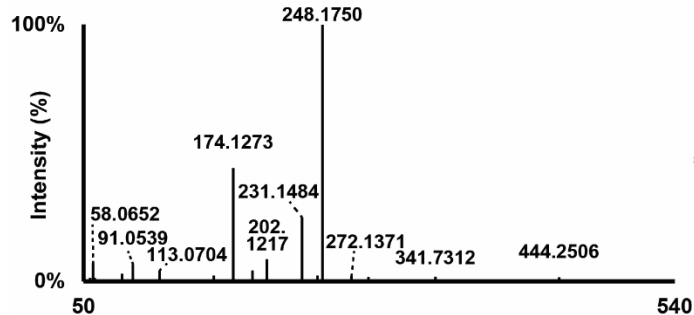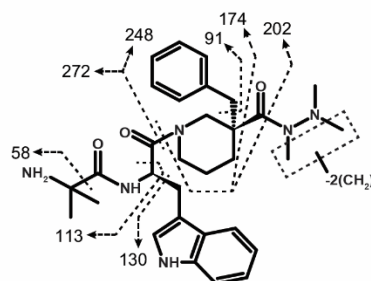**M10**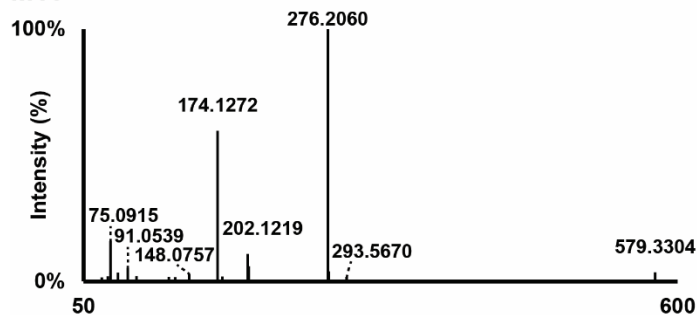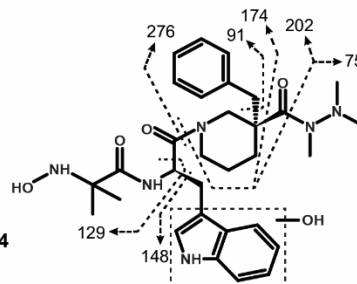**M11**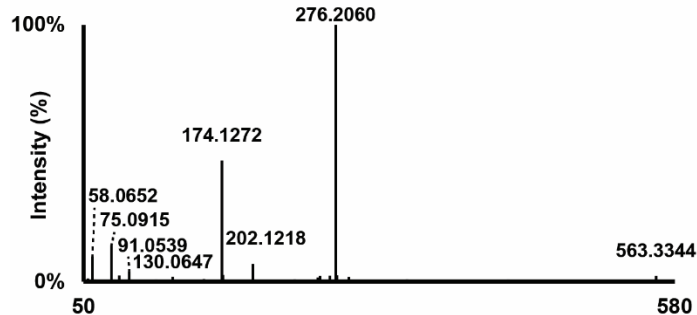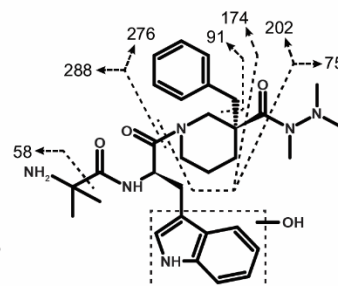**M13**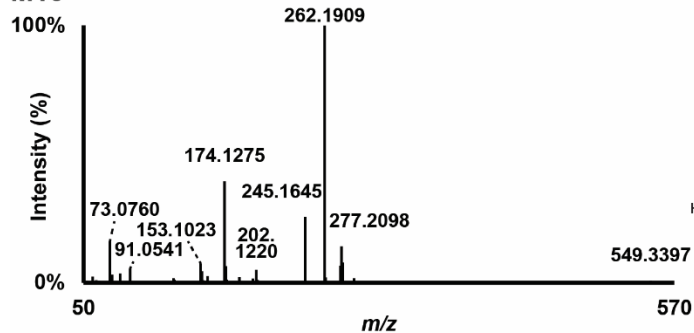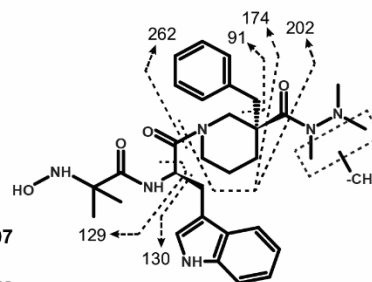

**M15**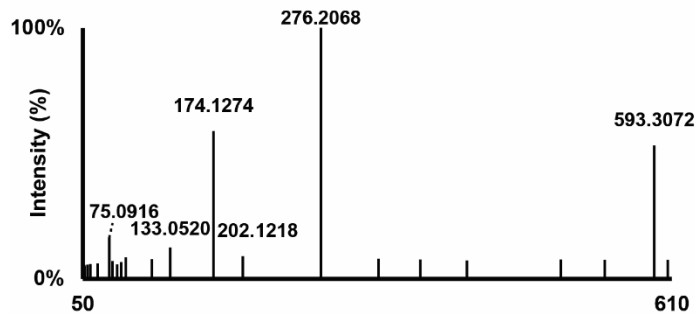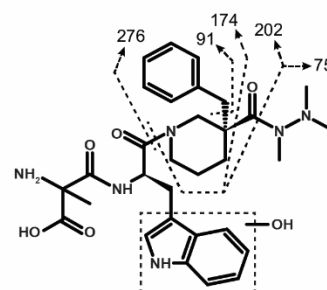**M16**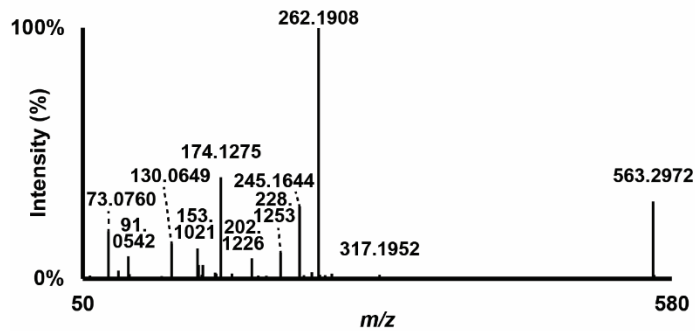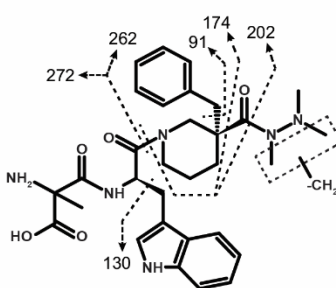

Supplement: s1 [file s1]
