# Supplementary material for: Metabolism Study of Anamorelin, a GHSR1a Receptor Agonist Potentially Misused in Sport, with Human Hepatocytes and LC-HRMS/MS
Source: MDPI journal article supplement (doi:10.3390/metabo13080949), 2023-08-15
Supplement: s1 [file s1]

**Table S3.** Inclusion list for data-dependent tandem mass spectrometry acquisition.

| Transformation    | Elemental composition                                           | [M+H] <sup>+</sup><br>( <i>m/z</i> ) | [M-H] <sup>-</sup><br>( <i>m/z</i> ) | Reference transformation                                                             |
|-------------------|-----------------------------------------------------------------|--------------------------------------|--------------------------------------|--------------------------------------------------------------------------------------|
| None (anamorelin) | C <sub>31</sub> H <sub>42</sub> N <sub>6</sub> O <sub>3</sub>   | 547.3391                             | 545.3246                             | Parent                                                                               |
| -C -2H            | C <sub>30</sub> H <sub>40</sub> N <sub>6</sub> O <sub>3</sub>   | 533.3235                             | 531.3089                             | <i>N</i> -Demethylation                                                              |
| -2C -4H           | C <sub>29</sub> H <sub>38</sub> N <sub>6</sub> O <sub>3</sub>   | 519.3078                             | 517.2933                             | <i>N,N</i> -Didemethylation                                                          |
| -2C -5H -N        | C <sub>29</sub> H <sub>37</sub> N <sub>5</sub> O <sub>3</sub>   | 504.2969                             | 502.2824                             | <i>N</i> -Dealkylation (trimethylhydrazino)                                          |
| -3C -7H -N        | C <sub>28</sub> H <sub>35</sub> N <sub>5</sub> O <sub>3</sub>   | 490.2813                             | 488.2667                             | <i>N</i> -Demethylation + <i>N</i> -Dealkylation (trimethylhydrazino)                |
| -3C -8H -2N +O    | C <sub>28</sub> H <sub>34</sub> N <sub>4</sub> O <sub>4</sub>   | 491.2653                             | 489.2507                             | <i>N</i> -Demethylation + <i>N</i> -Dealkylation (trimethylhydrazino) to COOH        |
| -4C -7H -N -O     | C <sub>27</sub> H <sub>35</sub> N <sub>5</sub> O <sub>2</sub>   | 462.2864                             | 460.2718                             | <i>N</i> -Dealkylation (methylalanine)                                               |
| -15C -17H -3N -2O | C <sub>16</sub> H <sub>25</sub> N <sub>3</sub> O                | 276.2070                             | 274.1925                             | <i>N</i> -Dealkylation (piperidine)                                                  |
| -16C -22H -2N -O  | C <sub>15</sub> H <sub>20</sub> N <sub>4</sub> O <sub>2</sub>   | 289.1659                             | 287.1513                             | <i>N</i> -Dealkylation (piperidine)                                                  |
| -16C -23H -3N     | C <sub>15</sub> H <sub>19</sub> N <sub>3</sub> O <sub>3</sub>   | 290.1499                             | 288.1354                             | <i>N</i> -Dealkylation (piperidine) to COOH                                          |
| +O                | C <sub>31</sub> H <sub>42</sub> N <sub>6</sub> O <sub>2</sub>   | 563.3340                             | 561.3195                             | Oxidation                                                                            |
| +2H               | C <sub>31</sub> H <sub>44</sub> N <sub>6</sub> O <sub>3</sub>   | 549.3548                             | 547.3402                             | Reduction                                                                            |
| -2H +O            | C <sub>31</sub> H <sub>40</sub> N <sub>6</sub> O <sub>4</sub>   | 561.3184                             | 559.3038                             | Ketone formation                                                                     |
| +2O               | C <sub>31</sub> H <sub>42</sub> N <sub>6</sub> O <sub>5</sub>   | 579.3289                             | 577.3144                             | Dioxidation                                                                          |
| +4H               | C <sub>31</sub> H <sub>46</sub> N <sub>6</sub> O <sub>3</sub>   | 551.3704                             | 549.3559                             | Direduction                                                                          |
| +2H +2O           | C <sub>31</sub> H <sub>44</sub> N <sub>6</sub> O <sub>5</sub>   | 581.3446                             | 579.3300                             | Dihydrodiol formation                                                                |
| +6C +8H +6O       | C <sub>37</sub> H <sub>50</sub> N <sub>6</sub> O <sub>9</sub>   | 723.3712                             | 721.3567                             | Glucuronidation                                                                      |
| +6C +10H +6O      | C <sub>37</sub> H <sub>52</sub> N <sub>6</sub> O <sub>9</sub>   | 725.3869                             | 723.3723                             | Reduction + Glucuronidation                                                          |
| +6C +8H +7O       | C <sub>37</sub> H <sub>50</sub> N <sub>6</sub> O <sub>10</sub>  | 739.3661                             | 737.3516                             | Oxidation + Glucuronidation                                                          |
| +3O +S            | C <sub>31</sub> H <sub>42</sub> N <sub>6</sub> O <sub>6</sub> S | 627.2959                             | 625.2814                             | Sulfation                                                                            |
| +2H +3O +S        | C <sub>31</sub> H <sub>44</sub> N <sub>6</sub> O <sub>6</sub> S | 629.3116                             | 627.2970                             | Reduction + Sulfation                                                                |
| +4O +S            | C <sub>31</sub> H <sub>42</sub> N <sub>6</sub> O <sub>7</sub> S | 643.2908                             | 641.2763                             | Oxidation + Sulfation                                                                |
| +2C +2H +O        | C <sub>33</sub> H <sub>44</sub> N <sub>6</sub> O <sub>4</sub>   | 589.3497                             | 587.3351                             | Acetylation                                                                          |
| -H                | C <sub>30</sub> H <sub>42</sub> N <sub>6</sub> O <sub>3</sub>   | 545.3235                             | -                                    | Iminium formation [Charged]                                                          |
| -5C -9H -N -O     | C <sub>26</sub> H <sub>33</sub> N <sub>5</sub> O <sub>2</sub>   | 448.2707                             | 446.2561                             | <i>N</i> -Demethylation + <i>N</i> -Dealkylation (methylalanine)                     |
| -16C -19H -3N -2O | C <sub>15</sub> H <sub>23</sub> N <sub>3</sub> O                | 262.1914                             | 260.1768                             | <i>N</i> -Demethylation + <i>N</i> -Dealkylation (piperidine)                        |
| -C -2H +O         | C <sub>30</sub> H <sub>40</sub> N <sub>6</sub> O <sub>4</sub>   | 549.3184                             | 547.3038                             | <i>N</i> -Demethylation + Oxidation                                                  |
| -C                | C <sub>30</sub> H <sub>42</sub> N <sub>6</sub> O <sub>3</sub>   | 535.3391                             | 533.3246                             | <i>N</i> -Demethylation + Reduction                                                  |
| -C -4H +O         | C <sub>30</sub> H <sub>38</sub> N <sub>6</sub> O <sub>4</sub>   | 547.3027                             | 545.2882                             | <i>N</i> -Demethylation + Ketone formation                                           |
| -6C -12H -2N -O   | C <sub>25</sub> H <sub>30</sub> N <sub>4</sub> O <sub>2</sub>   | 419.2442                             | 417.2296                             | <i>N</i> -Dealkylation (trimethylhydrazino) + <i>N</i> -Dealkylation (methylalanine) |
| -17C -22H -4N -2O | C <sub>14</sub> H <sub>20</sub> N <sub>2</sub> O                | 233.1648                             | 231.1503                             | <i>N</i> -Dealkylation (trimethylhydrazino) + <i>N</i> -Dealkylation (piperidine)    |
| -2C -5H -N +O     | C <sub>29</sub> H <sub>37</sub> N <sub>5</sub> O <sub>4</sub>   | 520.2918                             | 518.2773                             | <i>N</i> -Dealkylation (trimethylhydrazino) + Oxidation                              |
| -2C -3H -N        | C <sub>29</sub> H <sub>39</sub> N <sub>5</sub> O <sub>3</sub>   | 506.3126                             | 504.2980                             | <i>N</i> -Dealkylation (trimethylhydrazino) + Reduction                              |
| -2C -7H -N +O     | C <sub>29</sub> H <sub>35</sub> N <sub>5</sub> O <sub>4</sub>   | 518.2762                             | 516.2616                             | <i>N</i> -Dealkylation (trimethylhydrazino) + Ketone formation                       |
| -4C -7H -N        | C <sub>27</sub> H <sub>15</sub> N <sub>5</sub> O <sub>3</sub>   | 478.2813                             | 476.2667                             | <i>N</i> -Dealkylation (methylalanine) + Oxidation                                   |
| -4C -5H -N -O     | C <sub>27</sub> H <sub>35</sub> N <sub>5</sub> O <sub>2</sub>   | 464.3020                             | 462.2874                             | <i>N</i> -Dealkylation (methylalanine) + Reduction                                   |
| -4C -9H -N        | C <sub>27</sub> H <sub>33</sub> N <sub>5</sub> O <sub>3</sub>   | 476.2656                             | 474.2511                             | <i>N</i> -Dealkylation (methylalanine) + Ketone formation                            |
| -15C -17H -3N -O  | C <sub>16</sub> H <sub>29</sub> N <sub>3</sub> O <sub>2</sub>   | 292.2020                             | 290.1874                             | <i>N</i> -Dealkylation (piperidine) + Oxidation                                      |
| -15C -15H -3N -2O | C <sub>16</sub> H <sub>27</sub> N <sub>3</sub> O                | 278.2227                             | 276.2081                             | <i>N</i> -Dealkylation (piperidine) + Reduction                                      |
| -15C -19H -3N -O  | C <sub>16</sub> H <sub>23</sub> N <sub>3</sub> O <sub>2</sub>   | 290.1863                             | 288.1718                             | <i>N</i> -Dealkylation (piperidine) + Ketone formation                               |
| -16C -22H -2N     | C <sub>15</sub> H <sub>20</sub> N <sub>4</sub> O <sub>3</sub>   | 305.1608                             | 303.1463                             | <i>N</i> -Dealkylation (piperidine) + Oxidation                                      |
| -16C -20H -2N -O  | C <sub>15</sub> H <sub>22</sub> N <sub>4</sub> O <sub>2</sub>   | 291.1816                             | 289.1670                             | <i>N</i> -Dealkylation (piperidine) + Reduction                                      |

|                  |                                                               |          |          |                                                                |
|------------------|---------------------------------------------------------------|----------|----------|----------------------------------------------------------------|
| -16C -24H -2N    | C <sub>15</sub> H <sub>18</sub> N <sub>4</sub> O <sub>3</sub> | 303.1452 | 301.1306 | <i>N</i> -Dealkylation (piperidine) + Ketone formation         |
| -16C -23H -3N +O | C <sub>15</sub> H <sub>19</sub> N <sub>3</sub> O <sub>4</sub> | 306.1448 | 304.1303 | <i>N</i> -Dealkylation (piperidine) to COOH + Oxidation        |
| -16C -21H -3N    | C <sub>15</sub> H <sub>21</sub> N <sub>3</sub> O <sub>3</sub> | 292.1656 | 290.1510 | <i>N</i> -Dealkylation (piperidine) to COOH + Reduction        |
| -16C -25H -3N +O | C <sub>15</sub> H <sub>17</sub> N <sub>3</sub> O <sub>4</sub> | 304.1292 | 302.1146 | <i>N</i> -Dealkylation (piperidine) to COOH + Ketone formation |

---
