# Supplementary material for: Metabolism Study of Anamorelin, a GHSR1a Receptor Agonist Potentially Misused in Sport, with Human Hepatocytes and LC-HRMS/MS
Source: MDPI journal article supplement (doi:10.3390/metabo13080949), 2023-08-15
Supplement: s1 [file s1]

**Table S1.** Biotransformation, elemental composition, probability score, and Simplified Molecular-Input Line-Entry Specification (SMILES) of anamorelin metabolites predicted with GLORYx software.

| ID     | Transformation            | Elemental composition                                         | Score (%) | SMILES                                                                                                    |
|--------|---------------------------|---------------------------------------------------------------|-----------|-----------------------------------------------------------------------------------------------------------|
| Parent |                           | C <sub>31</sub> H <sub>42</sub> N <sub>6</sub> O <sub>3</sub> |           | <chem>CC(C)(C(=O)NC(CC1=CNC2=CC=CC=C21)C(=O)N3CCCC(C3)(CC4=CC=CC=C4)C(=O)N(C)N(C)C)N</chem>               |
| pM1    | <i>N</i> -Acetylation     | C <sub>33</sub> H <sub>44</sub> N <sub>6</sub> O <sub>4</sub> | 88        | <chem>O=C(N2CCCC(C(=O)N(N(C)C)C)(Cc1cccc1)C2)C(NC(=O)C(NC(=O)C)(C)C)Cc4c3cccc3nc4</chem>                  |
| pM2    | Aromatic Hydroxylation    | C <sub>31</sub> H <sub>42</sub> N <sub>6</sub> O <sub>4</sub> | 36        | <chem>O=C(N2CCCC(C(=O)N(N(C)C)C)(Cc1cccc1)C2)C(NC(=O)C(N)(C)C)Cc4c3ccc(O)cc3nc4</chem>                    |
| pM3    | Aromatic Hydroxylation    | C <sub>31</sub> H <sub>42</sub> N <sub>6</sub> O <sub>4</sub> | 36        | <chem>O=C(N2CCCC(C(=O)N(N(C)C)C)(Cc1cccc1)C2)C(NC(=O)C(N)(C)C)Cc4c3ccc(O)c3nc4</chem>                     |
| pM4    | Aromatic Hydroxylation    | C <sub>31</sub> H <sub>42</sub> N <sub>6</sub> O <sub>4</sub> | 36        | <chem>O=C(N2CCCC(C(=O)N(N(C)C)C)(Cc1cccc1)C2)C(NC(=O)C(N)(C)C)Cc4c3cc(O)ccc3nc4</chem>                    |
| pM5    | Aromatic Hydroxylation    | C <sub>31</sub> H <sub>42</sub> N <sub>6</sub> O <sub>4</sub> | 36        | <chem>O=C(N2CCCC(C(=O)N(N(C)C)C)(Cc1cccc1)C2)C(NC(=O)C(N)(C)C)Cc4c3cccc3nc4O</chem>                       |
| pM6    | <i>N</i> -Demethylation   | C <sub>30</sub> H <sub>40</sub> N <sub>6</sub> O <sub>3</sub> | 30        | <chem>O=C(N2CCCC(C(=O)N(NC)C)(Cc1cccc1)C2)C(NC(=O)C(N)(C)C)Cc4c3cccc3nc4</chem>                           |
| pM7    | Aliphatic Hydroxylation   | C <sub>31</sub> H <sub>42</sub> N <sub>6</sub> O <sub>4</sub> | 30        | <chem>O=C(N2CCCC(C(=O)N(N(C)CO)C)(Cc1cccc1)C2)C(NC(=O)C(N)(C)C)Cc4c3cccc3nc4</chem>                       |
| pM8    | <i>N</i> -Oxidation       | C <sub>31</sub> H <sub>42</sub> N <sub>6</sub> O <sub>4</sub> | 30        | <chem>O=C(N2CCCC(C(=O)N([N+])([O-])(C)C)C)(Cc1cccc1)C2)C(NC(=O)C(N)(C)C)Cc4c3cccc3nc4</chem>              |
| pM9    | <i>N</i> -Glucuronidation | C <sub>37</sub> H <sub>50</sub> N <sub>6</sub> O <sub>9</sub> | 30        | <chem>O=C(N(N(C)C)C)C5(Cc1cccc1)CCCN(C(=O)C(NC(=O)C(NC2OC(C(=O)O)C(O)C(O)C2O)(C)C)Cc4c3cccc3nc4)C5</chem> |
| pM10   | <i>N</i> -Oxidation       | C <sub>31</sub> H <sub>42</sub> N <sub>6</sub> O <sub>4</sub> | 28        | <chem>O=C(N2CCCC(C(=O)[N+](O-)(N(C)C)C)(Cc1cccc1)C2)C(NC(=O)C(N)(C)C)Cc4c3cccc3nc4</chem>                 |
| pM11   | <i>N</i> -Demethylation   | C <sub>30</sub> H <sub>40</sub> N <sub>6</sub> O <sub>3</sub> | 28        | <chem>O=C(N2CCCC(C(=O)NN(C)C)(Cc1cccc1)C2)C(NC(=O)C(N)(C)C)Cc4c3cccc3nc4</chem>                           |
| pM12   | Aliphatic Hydroxylation   | C <sub>31</sub> H <sub>42</sub> N <sub>6</sub> O <sub>4</sub> | 28        | <chem>O=C(N2CCCC(C(=O)N(N(C)C)CO)(Cc1cccc1)C2)C(NC(=O)C(N)(C)C)Cc4c3cccc3nc4</chem>                       |
