# Supplementary material for: Metabolism Study of Anamorelin, a GHSR1a Receptor Agonist Potentially Misused in Sport, with Human Hepatocytes and LC-HRMS/MS
Source: MDPI journal article supplement (doi:10.3390/metabo13080949), 2023-08-15
Supplement: s1 [file s1]

**Table S2.** Transformations for generating anamorelin potential metabolites with Compound Discoverer software for data mining.

|                          |                                                                   |
|--------------------------|-------------------------------------------------------------------|
| Phase I                  | Desaturation (2H → ∅)                                             |
|                          | Dihydrodiol formation (∅ → 2H 2O)                                 |
|                          | Ketone formation (O → 2H)                                         |
|                          | Oxidation (∅ → O)                                                 |
|                          | Oxidative deamination to alcohol (2H N → H O)                     |
|                          | Oxidative deamination to ketone (2H N → O)                        |
|                          | Reduction (∅ → 2H)                                                |
| Phase II                 | Acetylation (H → 2C 3H O)                                         |
|                          | Carnitine conjugation on amine (2H N → 7C 14H N 3O)               |
|                          | Cysteine conjugation on dihydrodiol (H O → 3C 6H N 2O S)          |
|                          | Cysteine-Glycine conjugation on dihydrodiol (H O → 5C 9H 2N 3O S) |
|                          | Glucuronidation (H → 6C 8H 6O)                                    |
|                          | Glutathionylation on dihydrodiol (H O → 10C 16H 3N 6O S)          |
|                          | Glycine conjugation on amine (H → 2C 3H 2O)                       |
|                          | Methylation (H → C 3H)                                            |
|                          | Sulfation (H → H 3O S)                                            |
|                          | Sulfation on dihydrodiol (H O → H 3O S)                           |
|                          | Thiol conjugation (H O → H S)                                     |
| Max # dealkylation       | 4                                                                 |
| Max # Phase II reactions | 2                                                                 |
| Max # total reactions    | 5                                                                 |
