# Supplementary material for: Metabolism Study of Anamorelin, a GHSR1a Receptor Agonist Potentially Misused in Sport, with Human Hepatocytes and LC-HRMS/MS
Source: Metabolites. 2023 Aug 15;13(8):949. doi: 10.3390/metabo13080949 (PMC10456928; doi:10.3390/metabo13080949)
Supplement: Supplementary file 1 [file metabolites-13-00949-s001.zip]

Archive with 4 entries (4 files):
- AnamorelinMetID_FigureS1_FINAL.pdf
- AnamorelinMetID_TableS1_FINAL.pdf
- AnamorelinMetID_TableS2_FINAL.pdf
- AnamorelinMetID_TableS3_FINAL.pdf
